# Supplementary material
Source: MDPI journal article supplement (https://www.mdpi.com/2076-3417/7/11/1172)
Supplement: s1 [file s1]

MATLAB code

Function CellEOLStudy

MATLAB function which studies the End of Life of a given lithium-ion cell. It extracts the required data from the data structure, initializes all the variables required by the particle filter and plots all the analysis and results for the EOL study.

function cellEOLStudy (cellData)

%% Function to predict battery battery End of Life using Capacity

%% measurements

% Using Particle Filtering Framework and C measurements (obtained

% from the discharged output current) of the cell alon time,

% predict the EOL

%

% Usage:

% function cellEOLStudy (cellData)

%

% Inputs:

% cellData = structure with the following fields

% .type = type of measurement, can be 'charge', 'discharge'

% or 'impedance'

% .ambient_temperature = ambient temperature (degree C)

% .time = the date and time of the start of the cycle, in

% MATLAB date vector format

% .data = data structure containing the measurements

% for charge the fields are:

% .Voltage_measured = Battery terminal voltage (Volts)

% .Current_measured = Battery output current (Amps)

% .Temperature_measured = Battery temperature (degree C)

% .Current_load = Current measured at load (Amps)

% .Voltage_load = Voltage measured at load (Volts)

% .Time = Time vector for the cycle (secs)

% for discharge the fields are:

% .Voltage_measured = Battery terminal voltage (Volts)

% .Current_measured = Battery output current (Amps)

% .Temperature_measured = Battery temperature (degree C)

% .Current_load = Current measured at load (Amps)

% .Voltage_load = Voltage measured at load (Volts)

% .Time = Time vector for the cycle (secs)

% .Capacity = Battery capacity (Ahr) for discharge

% for impedance the fields are not stated because they are

% not used.

%

% Outputs: none

%%

clc, close all;

%% Parameter initialization

[~,measNum] = size (cellData); % Get the number of cycles

cellEOLcapacity = 1.6; RealEOLcycle = 0;

EOLflag = true;

[predictionPoints, numPredPoints] = ...

chooseEOLpredictionPoints (cellData);

predicted = 1;

addData.delta_tkm1 = 0; % initial resting time

%% Obtain parameteres for testing (capacity, resting

% times and real EOL cycle)

capCell = zeros (1,measNum);

restingTimes = zeros (1,measNum);

charCyclesEq = zeros (1,measNum);

disCyclesEq = zeros (1,measNum);

cyclesEq = zeros (1,measNum);

disCycles = 0; %Discharging cycles counter

charCycles = 0; %Charging cycles counter

cycles = 0; %Total cycles counter

for i=1:1:measNum

if strcmpi(cellData(i).type,'charge')

%Charging measurements

charCycles = charCycles+1;

charCyclesEq (charCycles) = i;

cycles = cycles+1;

cyclesEq (cycles) = i;

elseif strcmpi(cellData(i).type,'discharge')

%Discharging measurements

disCycles = disCycles+1;

disCyclesEq (disCycles) = i;

cycles = cycles+1;

cyclesEq (cycles) = i;

capCell (disCycles) =...

calc_discharCycleCap_cell (cellData(i).data);

% Record real EOL cycle

if disCycles > 1

if (capCell(disCycles-1) > cellEOLcapacity ...

&& capCell(disCycles) > cellEOLcapacity)

EOLflag = true;

end

if (capCell(disCycles) < capCell(disCycles-1) ...

&& EOLflag && ...

capCell(disCycles) < cellEOLcapacity)

RealEOLcycle = disCycles;

EOLflag = false;

end

end

if cycles > 1

% Time between start of the measurements

interval = etime(...

cellData(cyclesEq (cycles)).time,cellData(...

cyclesEq (cycles-1)).time);

% Resting time between measurements

restingTimes (disCycles) = interval - ...

cellData(cyclesEq (cycles-1)).data.Time(end);

else

restingTimes (disCycles) = 0;

end

elseif strcmpi(cellData(i).type,'impedance')

end

end

calcCapacity = capCell (1:disCycles);

restingTimes = restingTimes (1:disCycles);

%% State system model xk = sys(k, x_km1, vk, Delta_tkm1)

nx = 3; % number of states

sys = @EOLstateTransition;

%% Measurement model zk = meas(k, xk, nk);

nz = 1; % measurement model dimension

meas = @EOLmeasurementModel;

%% PDF of process noise and noise generation function

nv = 3; % process noise vector dimension

gen_sys_noise = @EOLprocessNoise;

%% PDF of measurement noise and measurement noise generation

nn = 1; % measurement noise vector dimension

sigma_n = sqrt(4e-5);

p_meas_noise = @(n) normpdf(n, 0, sigma_n);

%% Initial PDF

gen_x0 = @() genIniEOLState;

%% Measurement likelihood PDF p(zk|xk)

p_zk_given_xk = @(k, zk, xk) p_meas_noise(zk - meas(k, xk, 0));

%% Number of iterations

iter = disCycles;

%% Allocate memory

xf0 = [0.5, 3e5, 2]'; % initial state

xf = zeros(nx, iter); xf(:,1) = xf0;

zh = zeros(nz, iter); zh(:,1) = meas(1, xf0, 0);

pfilter.k = 1; % first iteration number

pfilter.Np = 400; % number of particles

pfilter.w = zeros (pfilter.Np, iter); % weights

pfilter.particles = zeros (nx, pfilter.Np, iter); % particles

pfilter.gen_x0 = gen_x0;

pfilter.p_zk_given_xk = p_zk_given_xk;

pfilter.gen_sys_noise = gen_sys_noise;

EOLcycle = zeros (1,pfilter.Np);

pred_pdf = zeros (numPredPoints,pfilter.Np);

pts = zeros (numPredPoints,pfilter.Np);

figure (1);

%% Estimate state

for k = 2:iter

addData.delta_tkm1 = restingTimes(k-1);

fprintf('Step = %d/%d\n',k,iter);

% State estimation

pfilter.k = k;

[xf(:,k),pfilter]=particleFilter(sys, calcCapacity(k),...

pfilter, 'systematic_resampling', addData);

% Avoid NaN problems

if isnan (xf(1,k))

xf(1,k) = xf(1,k-1);

end

if isnan (xf(2,k))

xf(2,k) = xf(2,k-1);

end

if isnan (xf(3,k))

xf(3,k) = xf(3,k-1);

end

% Filtered measurement

zh(:,k) = meas(k, xf(:,k), 0);

if predicted <= numPredPoints %Propagate state to obtain EOL

if (predictionPoints(predicted) == k && RealEOLcycle > k)

for a=1:pfilter.Np

EOLcycle (1,a) = EOLprediction (sys,...

pfilter.particles(:,a,k), k, cellEOLcapacity, addData);

%EOLtime (2,a) = pfilter.w (a,k);

end

pts (predicted,:) = (k-1):(max(EOLcycle(1,:))-(k-1))...

/(pfilter.Np-1):max(EOLcycle(1,:));

pred_pdf (predicted,:) = ksdensity(EOLcycle (1,:),...

pts (predicted,:));

hold on;

c = linspace(0.8,0.2,predicted); % Compute pdf colours

for b=1:predicted % Plot pdfs

y_1=cellEOLcapacity+zeros(1,length(pts(b,:)));

y_2=pred_pdf(b,:)+cellEOLcapacity;

X=[pts(b,:),fliplr(pts(b,:))];

Y=[y_1,fliplr(y_2)];

fill(X,Y,[c(b),c(b),1]);

plot(predictionPoints(b),calcCapacity(...

predictionPoints(b)),'k*','MarkerSize', 20);

end

p1 = plot(1:iter,calcCapacity,'b','LineWidth',2);

p2 = plot(1:k,zh(1:k),'r','LineWidth',4);

p3 = plot([0 max([max(EOLcycle(1,:)) iter])],...

[cellEOLcapacity cellEOLcapacity],'Color',...

[0,0.7,0],'LineWidth',2);

p4 = plot([RealEOLcycle RealEOLcycle],...

[min([min(zh(1:k)) min(calcCapacity)]) ...

max([max(zh(1:k)) max(calcCapacity)])],'-.y',...

'LineWidth',3);

legend([p1 p2 p3 p4],'Measured capacity',...

'Filtered observation','EOL Threshold',...

'Real EOL Cycle');

title('Measured capacity vs filtered measurement by the particle filter','FontSize',12);

xlabel('Cycle number');ylabel('Capacity (Ahr)');

pause; clf(1);

predicted = predicted + 1;

elseif (predictionPoints(predicted) == k &&...

RealEOLcycle <= k)

fprintf('Prediction point %d is after the EOL (cycle %d).\n',predictionPoints(predicted),RealEOLcycle);

pause;

end

end

end

close (1);

%% Plot the real battery state vs filtered state

% vs particle paths

figure(1)

hold on; axis([1 iter 0 2.5]);

p1 = plot(1:iter,squeeze(pfilter.particles(3, :, :)),...

'Color',[0.7,0.7,0.7]);

p2 = plot(1:iter,xf(3,:),'r','LineWidth',4);

p3 = plot(1:iter,calcCapacity,'b','LineWidth',2);

plot([0 iter],[cellEOLcapacity cellEOLcapacity],'Color',...

[0,0.7,0],'LineWidth',2);

legend([p2 p1(1) p3],'Mean of estimated state',...

'Particle paths','Measured Capacity');

xlabel('Cycle number');ylabel('Capacity (Ahr)');

%% Make plots of the evolution of all the state parameters

showDensityEvol (pfilter.particles(1,:,:), 'Beta1', 'Cycle', 2);

showDensityEvol (pfilter.particles(2,:,:), 'Beta2', 'Cycle', 4);

showDensityEvol (pfilter.particles(3,:,:), 'Capacity', 'Cycle', 6);

pause; close all;

return;

Function EOLprocessNoise

This function basically creates the noise added in the system model of State of Life (SOL) tracking particle filter.

function vk = EOLprocessNoise

%% State transition model noise to predict End of Life (EOL)

% Generates the noise vector for state transition model of

% the particle filtering framework used for the battery cell

% End of Life prediction

%

% Usage:

% vk = EOLprocessNoise

%

% Inputs: none

%

% Outputs:

% vk = process noise vector

vk = zeros(1,3);

sigma_v = zeros(1,3);

sigma_v(1) = sqrt(1e-5);

sigma_v(2) = sqrt(2e6);

sigma_v(3) = sqrt(4e-4);

vk(1) = normrnd(0, sigma_v(1));

vk(2) = normrnd(0, sigma_v(2));

vk(3) = normrnd(0, sigma_v(3));

vk = vk';

return;

Function EOLstateTransition

It defines the system or state transition model of the particle filter used for the EOL prediction.

function xk = EOLstateTransition (k, xkm1, vk, addData)

%% State transition model to predict End of Life (EOL)

% Defines the state transition model for the battery cell

% End of Life prediction for the particle filtering framework

% using capacity measurements

%

% Usage:

% xk = EOLstateTransition (k, xkm1, vk, delta_tkm1)

%

% Inputs:

% k = iteration number

% xkm1 = state vector in the previous iteration

% vk = process noise vector

% addData = structure with additional data for the state

% transition model

% .delta_tkm1 = resting time between cycles (I=0) for the

% previous cycle

%

% Outputs:

% xk = predicted state vector

%

% Model parameters:

% x(1) = beta1; v(1) = phi1

% x(2) = beta2; v(2) = phi2

% x(3) = Capacity; v(3) = phi

% eta_c = Coulombic effienciency

%%

eta_c = 0.9962;

xk(1) = xkm1(1) + vk(1);

xk(2) = xkm1(2) + vk(2);

xk(3) = eta_c * xkm1(3) + xkm1(1)*exp(-xkm1(2)/...

addData.delta_tkm1) + vk(3);

xk = xk';

return;

Function EOLmeasurementModel

This function defines the measurement or observation model used by the SOL tracking particle filter.

function zk = EOLmeasurementModel (k, xk, nk)

%% Measurement model to predict End of Life (EOL)

% Defines the measurement model for the battery cell End of Life

% prediction for the particle filtering framework using capacity

% measurements

%

% Usage:

% zk = EOLmeasurementModel (k, xk, nk)

%

% Inputs:

% k = iteration number

% xk = state vector

% nk = measurement noise vector

%

% Outputs:

% zk = measurement vector

%

%% Programmed by:

% Raul Jaras

% Cranfield University, 20th June, 2013

%%

zk = xk(3) + nk;

Function genIniEOLState

It generates the initial values for the particles used in the first step of the particle filter. It gives random values for all the parameters of the EOL prediction state vector.

function x = genIniEOLState ()

%% Generate Initial End of Life (EOL) model state

% Gives random values for the initial state of the

% End of Life prediction model

%

% Usage:

% x = genIniEOLState ()

%

% Inputs: none

%

% Outputs:

% x = random state vector

% x(1) = beta1; x(2) = beta2; x(3) = Capacity;

x(1) = normrnd(0.5, sqrt(2.5e-2));

x(2) = normrnd(3e5, sqrt(3e10));

x(3) = normrnd(1.8, sqrt(4e-3));

x = x';

return;

Function chooseEOLpredictionPoints

This function asks the user to introduce the cycles at which he/she wants to predict the EOL for a cell.

function [points, numPoints] = chooseEOLpredictionPoints (cellData)

%% Function to choose the prediction points for the End of Life model

% Chooses the cycles (sample) when the model is going to predict

% the End of Life (EOL) for the battery cell

%

% Usage:

% [points, numPoints] = chooseEOLpredictionPoints (disCycleData)

%

% Inputs:

% cellData = structure with the following fields

% .type = operation type, can be charge, discharge or impedance

% .ambient_temperature = ambient temperature (degree C)

% .time = the date and time of the start of the cycle, in

% MATLAB date vector format

% .data = data structure containing the measurements

%

% Outputs:

% points = vector sample numbers when the prediction is to be done

% numPoints = number of prediction points

%

%% Parameter initialization

[~,measNum] = size (cellData); % Get the number of measurements

dischargingCycles = 0;

%% Ask for the number of predictions to do

clc;

%% Data extraction

for i=1:1:measNum

if strcmpi(cellData(i).type,'discharge')

%%Discharge measurements

dischargingCycles = dischargingCycles + 1;

else %%Impedance and charging measurements

end

end

disp(['There are a total of ', num2str(measNum),...

' measurements. ', num2str(dischargingCycles),...

' are discharging cycles.']);

disp('How many prediction points do you want to make? ');

numPoints=input ('Introduce the number of predictions: ');

chosenSamples = zeros (1,numPoints);

for i=1:numPoints

flag = true;

while flag

chosenSamples(i)=input (['Introduce prediction point ',...

num2str(i), ': ']);

if (chosenSamples(i) > 0 && chosenSamples(i)...

< dischargingCycles)

flag = false;

else

disp('Incorrect value. Introduce a correct value please.');

end

end

end

points = sort (chosenSamples);

return;

Function EOLprediction

It propagates the state of the cell until the EOL threshold for a given particle and returns the cycle number at which the cell reaches the EOL (for that particle).

function EOLcycle = EOLprediction (sys, x, k, EOL_treshold, addData)

%% Function to predict the End of Life (EOL) for a battery cell

% Using Particle Filtering Framework and Capacity measurements

% of the cell along time, predict the EOL cycle

%

% Usage:

% cellEODPrediction (disCycleData)

%

% Inputs:

% sys = function to handle process equation

% x = current state

% k = current iteration

% EOL_treshold = EOL capacity treshold

% addData = structure with additional info for the state

% transition model

%

% Outputs: none

%

% Model parameters:

% x(1) = beta1; v(1) = phi1

% x(2) = beta2; v(2) = phi2

% x(3) = Capacity; v(3) = phi

% eta_c = Coulombic effienciency

%% State propagation way

Cold = 100;

stateEvol = zeros(3,200);

proc_noise = [0 0 0]';

i = k; stateEvol (:,i) = x;

while (stateEvol(3, i) > EOL_treshold && Cold > stateEvol(3, i))

i = i + 1;

Cold = stateEvol(3,i-1);

stateEvol(:, i) = sys(k, stateEvol(:,i-1), proc_noise, addData); % simulate state

end

if (stateEvol(3, i) > EOL_treshold && Cold < stateEvol(3, i))

EOLcycle = NaN;

else

EOLcycle = i;

end

return;

Function particle_filter

This function implements the generic particle filter described in the flow chart from Figure 5-4 (systematic resampling).

function [xfk, pfilter] = particleFilter(sys, zk,...

pfilter, res_strategy, addData)

%% Generic particle filter

%

% Usage:

% [xfk, pfilter] = particleFilter(sys, zk, pfilter,

% res_strategy, addData)

%

% Inputs:

% sys = system model function handle

% zk = measurement vector at step k

% pfilter = structure with the following fields

% .k = step

% .Np = number of particles

% .w = particle weights (Np x T)

% .particles = particles (nx x Np x T)

% .gen_x0 = function handle of a procedure that

% samples from the initial pdf p_x0

% .p_zk_given_xk = function handle of PDF p(yk|xk)

% .gen_sys_noise = function handle to system noise generator

% res_strategy = resampling strategy. Set it to

% 'systematic_resampling'

% addData = structure with additional data for the state

% transition model

%

% Outputs:

% xfk = estimated state

% pfilter = the same input structure but updated at iteration k

%%

k = pfilter.k;

%% Assign initial values to variables

Np = pfilter.Np; % number of particles

nx = size(pfilter.particles,1); % number of states

wkm1 = pfilter.w(:,k-1); % weights of previous iteration

if k == 2 % at time k=1

for i = 1:Np % Generate initial particles

pfilter.particles(:,i,1) = pfilter.gen_x0();

end

wkm1 = repmat(1/Np, Np, 1); % Give initial weights

end

xkm1 = pfilter.particles(:,:,k-1); % extract particles from last

% iteration;

%% Allocate memory

xk = zeros(nx,Np);

wk = zeros(Np,1);

%%

for i = 1:Np

% Propagate state

xk(:,i) = sys(k, xkm1(:,i), pfilter.gen_sys_noise(), addData);

% Update weights

wk(i) = wkm1(i) * pfilter.p_zk_given_xk(k, zk, xk(:,i));

end;

%% Normalize weights

wk = wk./sum(wk);

%% Check degeneracy and resample if needed

Neff = 1/sum(wk.^2); %effective sample size

resamp_treshold = 0.50;

Ntres = resamp_treshold*Np;

if Neff < Ntres

[xk, wk] = resample(xk, wk, res_strategy);

disp('Resampled.')

end

%% Calculate filtered state

xfk = zeros(nx,1);

for i = 1:Np;

xfk = xfk + wk(i)*xk(:,i);

end

%% Save new weights and particles

pfilter.w(:,k) = wk;

pfilter.particles(:,:,k) = xk;

return;

Function resample

This function implements the resampling strategy described in the flow chart from Figure 5-5 (systematic resampling). The multinomial resampling technique described in [31] has also been implemented but it is not used.

function [xk, wk, idx] = resample(xk, wk, res_strategy)

Np = length(wk); % Np = number of particles

switch res_strategy

case 'systematic_resampling'

edges = min([0 cumsum(wk)'],1);

edges(end) = 1;

u1 = rand/Np;

[~, idx] = histc(u1:1/Np:1, edges);

otherwise

error('Resampling strategy not implemented.')

end;

xk = xk(:,idx); % extract new particles

wk = repmat(1/Np, 1, Np); % now all particles have the same weight

return;

xk = xk(:,idx); % extract new particles

wk = repmat(1/Np, 1, Np); % now all particles have the same weight

return;

Function calc_discharCycleCap_cell

This function calculates the charge extracted from a cell for a given discharge cycle using the Coulomb counting method (integrate discharge current during discharge).

function capacity = calc_discharCycleCap_cell (cycleData)

%% Function to calculate the measured discharged capacity for a cell

% during a discharging cycle

%

% Usage:

% capacity = calc_discharCycleCap_cell (cycleData)

%

% Inputs:

% cycleData = structure with the following fields (discharge cycle

% data)

% .Voltage_measured = Battery terminal voltage (Volts)

% .Current_measured = Battery output current (Amps)

% .Temperature_measured = Battery temperature (degree C)

% .Current_load = Current measured at load (Amps)

% .Voltage_load = Voltage measured at load (Volts)

% .Time = Time vector for the cycle (secs)

% .Capacity = Battery capacity (Ahr) for discharge

%

% Output:

% capacity

%% Initialize variables and allocate memory for arrays

[~,cycleSamples] = size (cycleData.Current_measured);

capacity = 0;

%% Calculate the discharged capacity as the discharged current along

% the time

for i=2:1:cycleSamples

intMeanCur = - (cycleData.Current_measured (i-1) + ...

cycleData.Current_measured (i)) / 2; %Interval mean current

%Time interval between samples y hours

timeInt = (cycleData.Time (i) - cycleData.Time (i-1))/3600;

capacity = capacity + intMeanCur * timeInt;

end

return;

Function cellEODStudy

MATLAB function which studies the End of Discharge of a given lithium-ion cell. It extracts the required data from the discharge data structure, initializes all the variables required by the particle filter and plots all the analysis and results for the EOD study.

function cellEODStudy (disCycleData,capacity)

%% Function to predict the End of Discharge (EOD) for a battery cell

% Using Particle Filtering Framework and V measurements of the cell

% along time, predict the EOD

%

% Usage:

% cellEODStudy (disCycleData)

%

% Inputs:

% disCycleData = structure with the following fields

% .Voltage_measured = Battery terminal voltage (Volts)

% .Current_measured = Battery output current (Amps)

% .Temperature_measured = Battery temperature (degree C)

% .Current_load = Current measured at load (Amps)

% .Voltage_load = Voltage measured at load (Volts)

% .Time = Time vector for the cycle (secs)

% .Capacity = Battery capacity (Ahr) for discharge

%

% Outputs: none

%%

clc, close all;

%% Parameter initialization

[~,numSamples] = size (disCycleData.Time); % Total number of samples

EODvoltage = cellEDVSelection;

[predictionPoints, numPredPoints] = ...

chooseEODpredictionPoints (disCycleData);

predicted = 1;

voltMeas = disCycleData.Voltage_measured;

currMeas = disCycleData.Current_measured;

samplingTimes = disCycleData.Time;

addData.tkm1 = 0; % initial sample time

addData.Ts = 16.5; % initial sampling period

addData.cap = capacity;

%% Obtain the real EOD time

index = 1;

while (voltMeas(index) > EODvoltage && index <= numSamples)

index = index + 1;

end

realEOD = samplingTimes (index); realEODindex = index;

%% State transition equation xk = sys(k, x_km1, vk, tkm1,Ts)

nx = 6; % number of states

sys = @EODstateTransition;

%% Measurement model zk = meas(k, xk, nk);

nz = 1; % measurement model dimension

meas = @EODmeasurementModel;

%% PDF of process noise and noise generator function

nv = 6; % process noise vector dimension

gen_sys_noise = @EODprocessNoise;

%% PDF of measurement noise and measurement noise generation

nn = 1; % measurement noise vector dimension

sigma_n = sqrt(5e-4);

p_meas_noise = @(n) normpdf(n, 0, sigma_n);

%% Initial PDF

gen_x0 = @() genIniEODState ();

%% Measurement likelihood PDF p(zk|xk)

p_zk_given_xk = @(k, zk, xk) p_meas_noise(zk - meas(k, xk, 0));

%% Number of time steps

iter = numSamples;

%% Allocate memory

xf0 = [0.6, 900, 2.2e-5, 3.8e-3, 1e-7, 4]'; % initial state

xf = zeros(nx, iter); xf(:,1) = xf0;

zh = zeros(nz, iter); zh(:,1) = meas(1, xf0, 0);

SOC = zeros(1,iter); SOC(1) = 1;

pfilter.k = 1; % first iteration number

pfilter.Np = 400; % number of particles

pfilter.w = zeros(pfilter.Np, iter); % weights

pfilter.particles = zeros(nx, pfilter.Np, iter); % particles

pfilter.gen_x0 = gen_x0;

pfilter.p_zk_given_xk = p_zk_given_xk;

pfilter.gen_sys_noise = gen_sys_noise;

EODtime = zeros (2,pfilter.Np);

pred_pdf = zeros (numPredPoints,pfilter.Np);

pts = zeros (numPredPoints,pfilter.Np);

figure (1);

%% Estimate state

for k = 2:iter

if (k > 2)

addData.tkm1 = samplingTimes(k-1);

addData.Ts = samplingTimes(k-1) - samplingTimes(k-2);

else

addData.tkm1 = 1e-5;

addData.Ts = 16.5;

end

SOC(k) = SOC(k-1) + currMeas(k-1)*addData.Ts/(capacity*3600);

addData.SOC = SOC(k-1);

fprintf('Time step = %d/%d\n',k,iter);

% State estimation

pfilter.k = k;

[xf(:,k), pfilter] = particleFilter(sys, voltMeas(k),...

pfilter, 'systematic_resampling', addData);

% Avoid NaN problems

if isnan (xf(6,k))

xf(6,k) = xf(6,k-1);

end

% filtered observation

zh(:,k) = meas(k, xf(:,k), 0);

if predicted <= numPredPoints % Propagate state to obtain EOD

if (predictionPoints(predicted) == k && realEODindex > k)

for a=1:pfilter.Np

EODtime (1,a) = EODprediction (sys,...

pfilter.particles(:,a,k), k, EODvoltage, ...

addData, samplingTimes);

% EODtime (2,a) = pfilter.w (a,k);

end

pts (predicted,:) = samplingTimes(k-1):...

(max(EODtime(1,:))-samplingTimes(k-1))/...

(pfilter.Np-1):max(EODtime(1,:));

pred_pdf (predicted,:) = ksdensity(EODtime (1,:),...

pts (predicted,:));

hold on;

c = linspace(0.8,0.2,predicted); % Compute pdf colours

for b=1:predicted

y_1=EODvoltage+zeros(1,length(pts(b,:)));

y_2=pred_pdf(b,:)*50+EODvoltage;

X=[pts(b,:),fliplr(pts(b,:))];

Y=[y_1,fliplr(y_2)];

fill(X,Y,[c(b),c(b),1]);

plot(samplingTimes(predictionPoints(b)),...

voltMeas(predictionPoints(b)),'k*',...

'MarkerSize', 20);

end

p1 = plot(samplingTimes,voltMeas,'b','LineWidth',2);

p2 = plot(samplingTimes(1:k),zh(1:k),'r','LineWidth',4);

p3 = plot([0 max([EODtime(1,:) samplingTimes])],...

[EODvoltage EODvoltage],'Color',[0,0.7,0],...

'LineWidth',2);

legend([p1 p2 p3],'Measured voltage',...

'Filtered observation','EOD Threshold');

title('Measured voltage vs filtered measurement','FontSize',12);

xlabel('Time (secs)');ylabel('Voltage (Volts)');

pause; clf (1);

predicted = predicted + 1;

elseif (predictionPoints(predicted) == k &&...

realEODindex <= k)

fprintf('Prediction point %d is after the EOD.\n',predictionPoints(predicted));

pause;

end

end

end

close (1);

%% Plot the real battery state vs filtered state

% vs particle paths

figure (1);

hold on; axis([samplingTimes(1) samplingTimes(iter) 1.5 4.5]);

p1 = plot(samplingTimes,squeeze(pfilter.particles(6, :, :)),...

'Color',[0.7,0.7,0.7]);

p2 = plot(samplingTimes,xf(6,:),'r','LineWidth',4);

p3 = plot(samplingTimes,voltMeas,'b','LineWidth',2);

legend([p2 p1(1) p3],'Mean of estimated state',...

'Particle paths','Measured Voltage');

xlabel('Time (secs)');ylabel('Voltage (V)');

%% Make plots of the evolution of all the state parameters

% state parameters

showDensityEvol (pfilter.particles(1,:,:), 'alfa1', 'Sample', 2);

showDensityEvol (pfilter.particles(2,:,:), 'alfa2', 'Sample', 4);

showDensityEvol (pfilter.particles(3,:,:), 'alfa3', 'Sample', 6);

showDensityEvol (pfilter.particles(4,:,:), 'alfa4', 'Sample', 8);

showDensityEvol (pfilter.particles(5,:,:), 'alfa5', 'Sample', 10);

pause; close all;

return;

Function EODprocessNoise

Similar to the EOL, this function creates the noise added in the system model of State of Charge (SOC) tracking particle filter.

function vk = EODprocessNoise

%% State transition model noise to predict End of Discharge (EOD)

% Generates the noise vector for state transition model of the

% particle filtering framework used for the battery cell End of

% Discharge prediction

%

% Usage:

% vk = EODprocessNoise

%

% Inputs: none

%

% Outputs:

% vk = process noise vector

%

% Model parameters:

% x(1) = alfa1; v(1) = w1

% x(2) = alfa2; v(2) = w2

% x(3) = alfa3; v(3) = w3

% x(4) = alfa4; v(4) = w4

% x(5) = alfa5; v(5) = w5

% x(6) = Voltage; v(6) = w

%% Memory Allocation

vk = zeros(1,6);

sigma_v = zeros(1,6);

%% Generate Noise

sigma_v(1) = sqrt(1e-4); vk(1) = normrnd(0, sigma_v(1));

sigma_v(2) = sqrt(100); vk(2) = normrnd(0, sigma_v(2));

sigma_v(3) = sqrt(1e-14); vk(3) = normrnd(0, sigma_v(3));

sigma_v(4) = sqrt(3e-11); vk(4) = normrnd(0, sigma_v(4));

sigma_v(5) = sqrt(1e-12); vk(5) = normrnd(0, sigma_v(5));

sigma_v(6) = sqrt(3e-4); vk(6) = normrnd(0, sigma_v(6));

vk = vk';

Function EODstateTransition

It defines the system or state transition model of the particle filter used for the EOD prediction.

function xk = EODstateTransition (k, xkm1, vk, addData)

%% State transition model to predict End of Discharge (EOD)

% Defines the state transition model for the battery cell End

% of Discharge prediction for the particle filtering framework

%

% Usage:

% xk = EODstateTransition (k, xkm1, vk, tkm1, Ts)

%

% Inputs:

% k = iteration number

% xkm1 = state vector in the previous iteration

% vk = process noise vector

% tkm1 = time of the previous measurementv (ti)

% addData = structure with additional data for the particle filter

% .tkm1 = time of the previous measurement (ti)

% .Ts = Time between samples

% .SOC = SOC for previous time step

%

% Outputs:

% xk = predicted state vector

%

% Model parameters:

% x = state vector v = state transition noise vector

% x(1) = alfa1

% x(2) = alfa2

% x(3) = alfa3

% x(4) = alfa4

% x(5) = alfa5

% x(6) = Voltage

SOC = addData.SOC; tkm1 = addData.tkm1;

Ts = addData.Ts;

xk(1) = xkm1(1) + vk(1);

xk(2) = xkm1(2) + vk(2);

xk(3) = xkm1(3) + vk(3);

xk(4) = 3e-3 * 1800 * (1 - SOC) / tkm1 * 2+ vk(4);

xk(5) = xkm1(5) + vk(5);

xk(6) = xkm1(6) - Ts * ...

((xkm1(1) * xkm1(2) * exp(-xkm1(2)/tkm1)) / tkm1^2 + ...

xkm1(3) * xkm1(4) * exp(xkm1(4) * tkm1) - xkm1(5)) ...

+ vk(6);

xk = xk';

Function EODmeasurementModel

This function defines the measurement or observation model used by particle filter employed SOC tracking.

function zk = EODmeasurementModel (k, xk, nk)

%% Measurement model to predict End of Discharge (EOD)

% Defines the measurement model for the battery cell End of Discharge

% prediction for the particle filtering framework

%

% Usage:

% zk = EODmeasurementModel (k, xk, nk)

%

% Inputs:

% k = iteration number

% xk = state vector

% nk = measurement noise vector

%

% Outputs:

% zk = measurement vector

%%

zk = xk(6) + nk;

Function genIniEODState

It generates the initial values for the particles used in the first step of the particle filter. It gives random values for all the parameters of the EOD prediction state vector.

function x = genIniEODState ()

%% Generate Initial End of Discharge (EOD) State

% Gives random values for the initial state of the End of Discharge

% prediction model

%

% Usage:

% x = genIniEODState ()

%

% Inputs: none

%

% Outputs:

% xk = random state vector

%

% Model parameters:

% x(1) = alfa1; v(1) = w1

% x(2) = alfa2; v(2) = w2

% x(3) = alfa3; v(3) = w3

% x(4) = alfa4; v(4) = w4

% x(5) = alfa5; v(5) = w5

% x(6) = Voltage; v(6) = w

x(1) = normrnd(0.6, sqrt(5e-4));

x(2) = normrnd(900, sqrt(200));

x(3) = normrnd(2.2e-5, sqrt(1e-12));

x(4) = normrnd(3.8e-3, sqrt(1e-9));

x(5) = normrnd(1e-7, sqrt(1e-10));

x(6) = normrnd(4, sqrt(0.01));

x = x';

Function chooseEODpredictionPoints

This function asks the user to introduce the cycles at which he/she wants to predict the EOD for a cell.

function [points, numPoints] = chooseEODpredictionPoints (disCycleData)

%% Function to choose the prediction points for the End of Discharge

% model

% Choose the time step (sample) when the model is going to predict

% the End of Discharge (EOD) for the battery cell

%

% Usage:

% cellEODStudy (disCycleData)

%

% Inputs:

% disCycleData = structure with the following fields

% .Voltage_measured = Battery terminal voltage (Volts)

% .Current_measured = Battery output current (Amps)

% .Temperature_measured = Battery temperature (degree C)

% .Current_load = Current measured at load (Amps)

% .Voltage_load = Voltage measured at load (Volts)

% .Time = Time vector for the cycle (secs)

% .Capacity = Battery capacity (Ahr) for discharge

%

% Outputs:

% points = vector sample numbers when the prediction is to be done

% numPoints = number of 1's in points (number of prediction points)

%

% Reference:

%% Parameter initialization

[~,numSamples] = size (disCycleData.Time); % Yotal number of samples

%% Ask for the number of predictions to do

clc;

disp(['There are a total of ', num2str(numSamples),...

' samples for that discharging cycle. ']);

disp('How many prediction points do you want to make? ');

numPoints=input ('Introduce the number of predictions: ');

chosenSamples = zeros (1,numPoints);

for i=1:numPoints

flag = true;

while flag

chosenSamples(i)=input (['Introduce prediction point ',...

num2str(i), ': ']);

if (chosenSamples(i) > 0 && chosenSamples(i) < numSamples)

flag = false;

else

disp('Incorrect value. Introduce a correct value please.');

end

end

end

points = sort (chosenSamples);

return;

Function EODprediction

It propagates the state of the cell until the EOD threshold for a given particle and returns the cycle number at which the cell reaches the EOD (for that particle).

function EODtime = EODprediction (sys, x, k, EOD_treshold,...

addData, samplingTimes)

%% Function to predict the End of Discharge (EOD) for a battery cell

% Using Particle Filtering Framework and V measurements of the cell

% along time, predict the EOD

%

% Usage:

% EODtime = EODprediction (sys, x, k, gen_sys_noise, EOD_treshold,...

% addData, samplingTimes)

%

% Inputs:

% sys = function handle to process equation

% x = state vector

% k = iteration number

% EOD_treshold = EOD threshold value

% addData = structure with additional data for the particle filter

% .tkm1 = time of the previous measurement (ti)

% .Ts = Time between samples

% .cap = Cell capacity from EOD prediction model

% .SOC = SOC for previous time step

% samplingTimes = Time vector (only used to have an aproximation

% of the number of steps when allocation memory

%

% Outputs:

% EODtime

%% Parameter initialization and memory allocation

predAddData.Ts = addData.tkm1 / (k-1);

predAddData.tkm1 = addData.tkm1;

predAddData.cap = addData.cap;

predAddData.SOC = addData.SOC;

Eold = 100;

[~,numSamples] = size (samplingTimes);

stateEvol = zeros(6,numSamples+100);

% No noise to propagate the state

proc_noise = [0 0 0 0 0 0]';

i = k;

stateEvol (:,i) = x;

%% Propagate state and obtain EOD time

while (stateEvol(6, i) > EOD_treshold && Eold > ...

stateEvol(6, i) && i < (numSamples+200))

i = i + 1;

Eold = stateEvol(6,i-1);

% Propagate state

stateEvol(:, i) = sys(k, stateEvol(:,i-1), ...

proc_noise, predAddData);

% Update parameters for next step

new_tkm1 = predAddData.tkm1 + predAddData.Ts;

new_SOC = predAddData.SOC - (1-predAddData.SOC)...

* predAddData.Ts / predAddData.tkm1;

predAddData.tkm1 = new_tkm1;

predAddData.SOC = new_SOC;

end

% If propagation does not reach EOD return NaN

if (stateEvol(6, i) > EOD_treshold && (Eold <...

stateEvol(6, i) || i < (numSamples+200)))

EODtime = NaN;

else

EODtime = predAddData.tkm1;

end

return;

Function showDensityEvol

Function to plot the evolution of the particle values with time. It receives all the particles along time for a given parameter of the state vector and shows how the values change with time.

function showDensityEvol (particles, paramName, xAxisLabel, figNumber)

%% Function to plot of the evolution of the density for a the state

% parameter

%

% Usage:

% cellEODStudy (disCycleData)

%

% Inputs:

% particles = matrix of particles

% paramName = parameter name for the plots titles

% xAxisLabel = x axis title

% figNumber = number of the first figure to open all at the same time

%

% Outputs:

% none

%%

figure(figNumber); hold on;

[~,numberParticles,iterations] = size (particles);

lowLim = min(min(min(particles))); upLim = max(max(max(particles)));

xj = 1:iterations;

yj = lowLim:(upLim - lowLim)/numberParticles:upLim;

[xx,yy] = meshgrid(xj,yj);

density = zeros(size(xx));

for j = xj

% Perform a kernel density estimation for each step

density(:,j) = ksdensity(particles(1,:,j), yj,'kernel','epanechnikov');

plot3(repmat(xj(j),length(yj),1), yj', density(:,j));

end

view(3); box on;

title(['Evolution of ',paramName],'FontSize',12)

xlabel(xAxisLabel);ylabel(paramName);

figure(figNumber+1)

mesh(xx,yy,density);

title(['Evolution of ',paramName],'FontSize',12)

xlabel(xAxisLabel);ylabel(paramName);

return;
